# Supplementary material for: Unravelling the Therapeutic Potential of Antibiotics in Hypoxia in a Breast Cancer MCF-7 Cell Line Model
Source: MDPI journal article supplement (doi:10.3390/ijms241411540), 2023-07-16
Supplement: s1 [file s1]

## Supplementary Material

### 1 Supplementary Figures and Tables

#### 1.1 Supplementary Figures

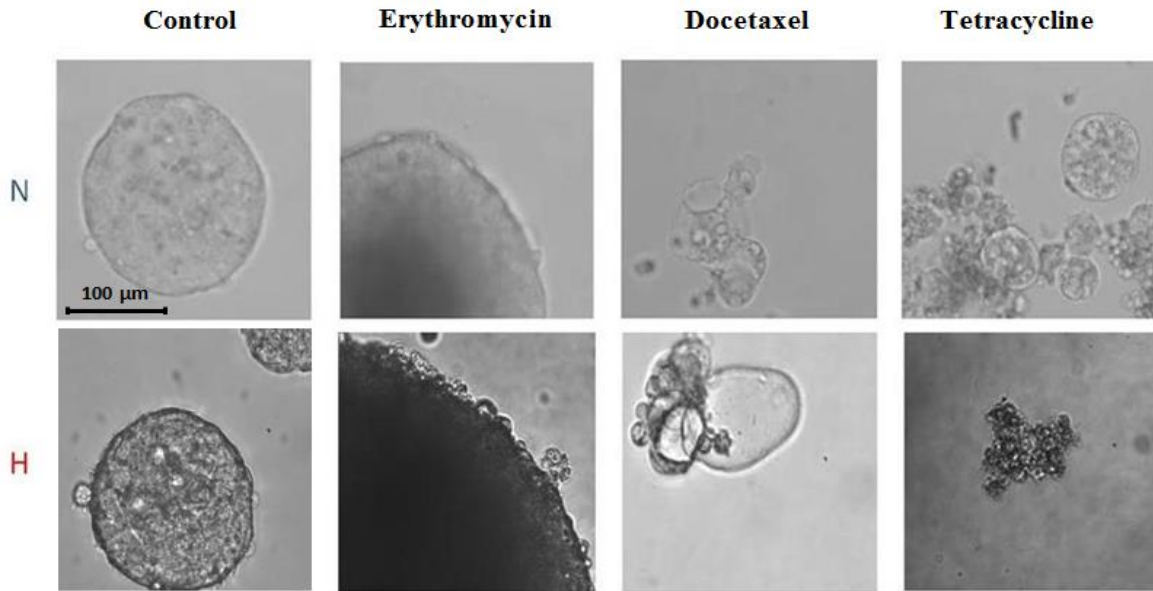

**Supplementary Figure S1.** Changes in morphology, caused by antibiotics in: **N** – normoxia, **H** –hypoxia.

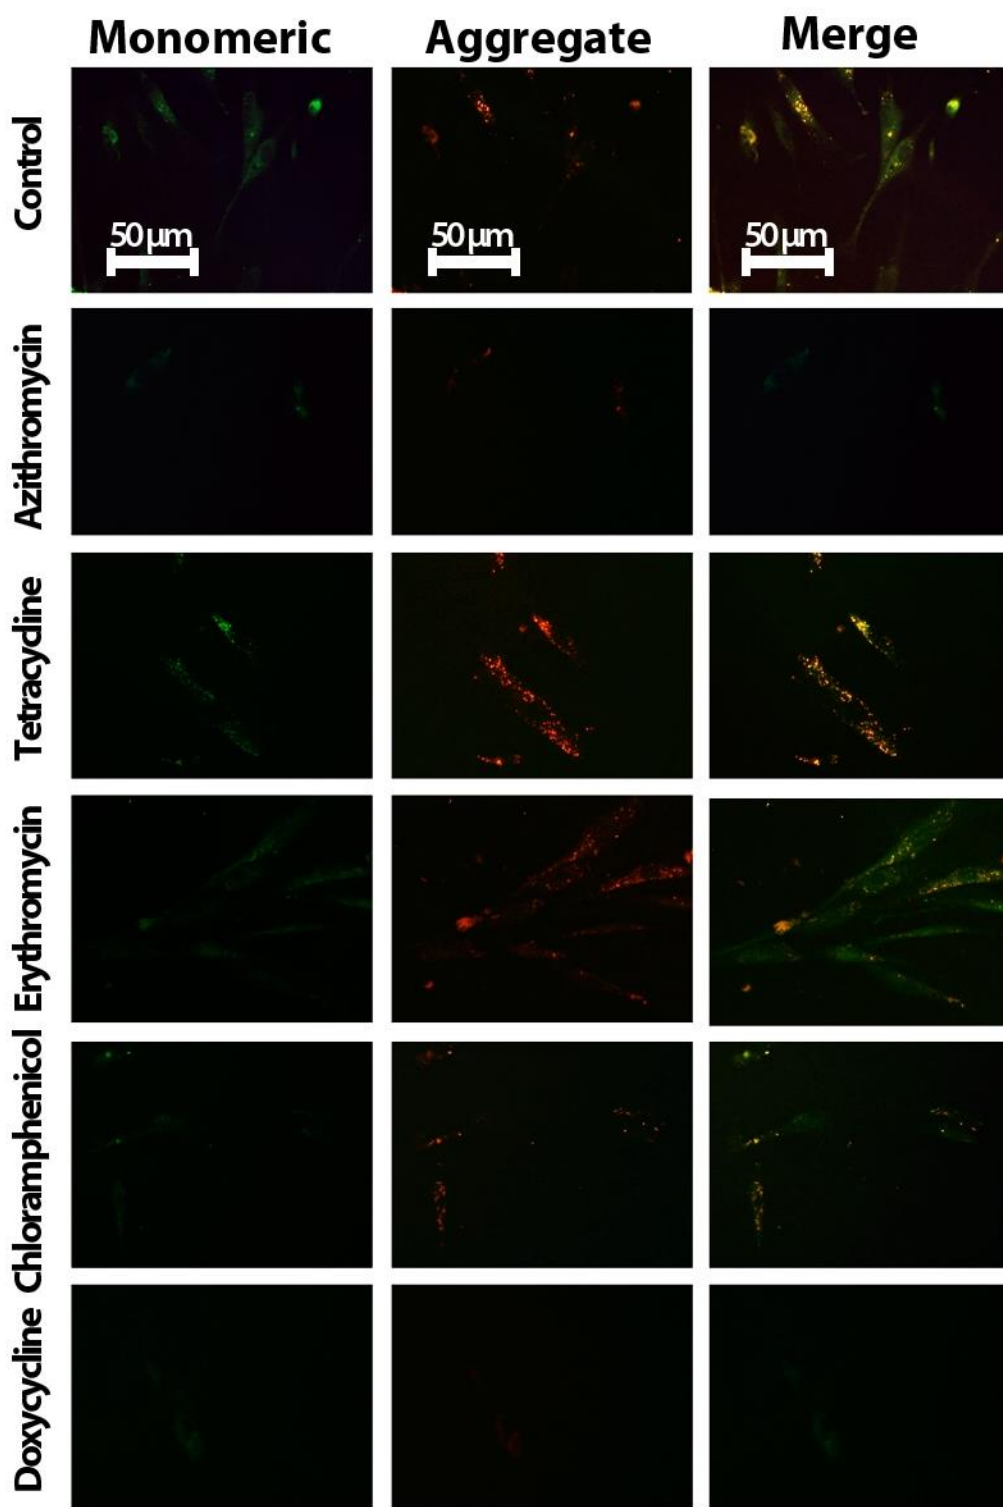

**Supplementary Figure S2.** JC-1 staining of mitochondrial network in Human Skin Fibroblasts after exposure to antibiotics; shift from red to green fluorescence represents depolarization of mitochondrial membrane potential; scale bar = 50  $\mu$ m.

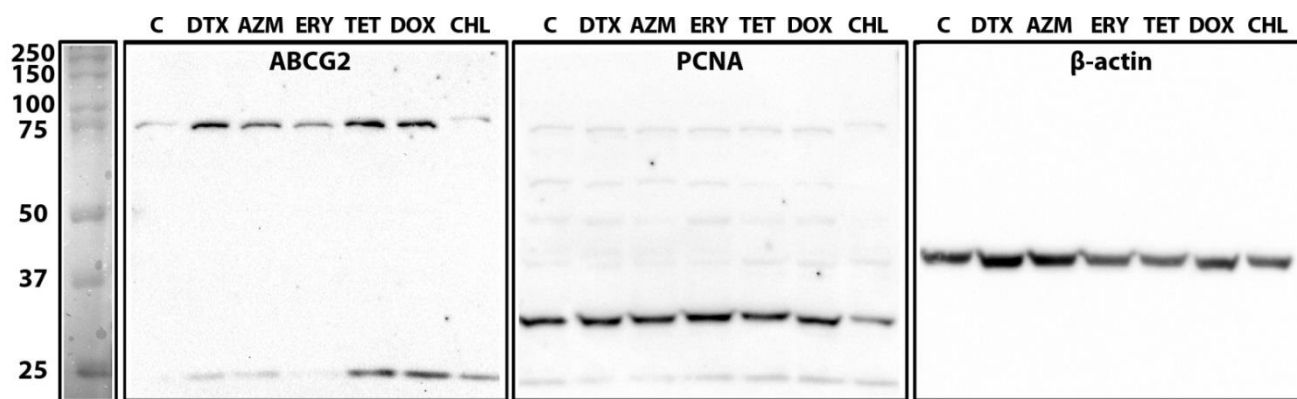

**Supplementary Figure S3.** Mammospheres cell lysates were analyzed by western blot using antibodies against **ABCG2**, **PCNA** and **β-actin**. Representative whole blots of Figure 4A are shown: **C** – control sample, **DTX** – docetaxel, **AZM** – azithromycin, **ERY** – erythromycin, **TET** – tertacycline, **DOX** – doxycycline, **CHL** – chloramphenicol.
